# Supplementary material for: Anal gas evacuation and colonic microbiota in patients with flatulence: effect of diet
Source: PubMed Central journal article supplement — Gut. 2013 Jun 13;63(3):401–8. doi: 10.1136/gutjnl-2012-303013 (PMC3933177; doi:10.1136/gutjnl-2012-303013), 2013-06-13
Supplement: gutjnl-2012-303013-s5.pdf [file gutjnl-2012-303013-s5.pdf]

**Table S1. Bacterial taxa involved in dysbiosis**

|                                                                      | Taxa                      | Healthy controls,<br>proportion of sequences* | Patients,<br>proportion of sequences* | P-value<br>(Mann-Whitney U test) |
|----------------------------------------------------------------------|---------------------------|-----------------------------------------------|---------------------------------------|----------------------------------|
| higher abundance in healthy controls<br>than in patients at baseline | unknown Oscillospira      | 0.016860                                      | 0.007793                              | P<0.03                           |
|                                                                      | unknown Oscillospira      | 0.001047                                      | 0.000411                              | P<0.03                           |
|                                                                      | Bacteroidespectinophilus  | 0.000819                                      | 0                                     | P<0.02                           |
|                                                                      | unknown Bacteroidales     | 0.000659                                      | 0.000266                              | P<0.02                           |
|                                                                      | unknown Clostridiales     | 0.000343                                      | 0.000014                              | P<0.02                           |
|                                                                      | unknown Ruminococcaceae   | 0.000117                                      | 0                                     | P<0.02                           |
|                                                                      | unknown Oscillospira      | 0.000077                                      | 0.000006                              | P<0.02                           |
| higher abundance in patients than in<br>healthy controls at baseline | unknown Coprococcus       | 0.00688                                       | 0.01554                               | P<0.005                          |
|                                                                      | Bacteroides ovatus        | 0.00382                                       | 0.01371                               | P<0.02                           |
|                                                                      | unknown Bifidobacteriales | 0.00950                                       | 0.01230                               | P<0.02                           |
|                                                                      | unknown Blautia           | 0.00190                                       | 0.00348                               | P<0.02                           |
|                                                                      | unknown Clostridium       | 0.00059                                       | 0.00237                               | P<0.004                          |
|                                                                      | unknown Clostridium       | 0.00091                                       | 0.00215                               | P<0.02                           |
|                                                                      | unknown Clostridium       | 0.00015                                       | 0.00036                               | P<0.02                           |
|                                                                      | unknown Clostridium       | 0.00001                                       | 0.00026                               | P<0.03                           |
| unknown Phascolarctobacterium                                        | 0                         | 0.00013                                       | P<0.009                               |                                  |

\* Data are mean values
