# Supplementary figures and images for: Anal gas evacuation and colonic microbiota in patients with flatulence: effect of diet
Source: PubMed Central journal article supplement — Gut. 2013 Jun 13;63(3):401–8. doi: 10.1136/gutjnl-2012-303013 (PMC3933177; doi:10.1136/gutjnl-2012-303013), 2013-06-13

# Supplemental Figure S2AB

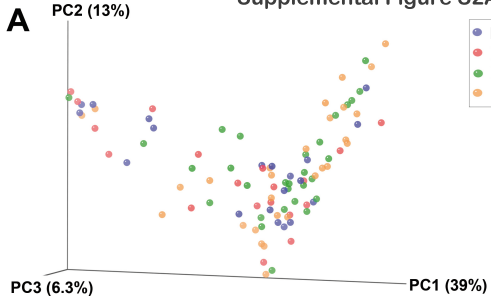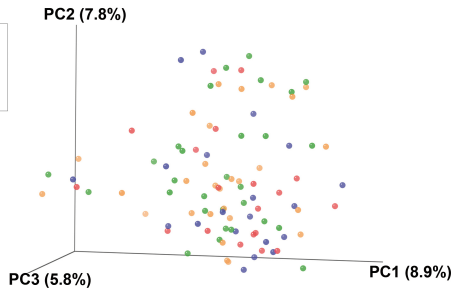

**B**

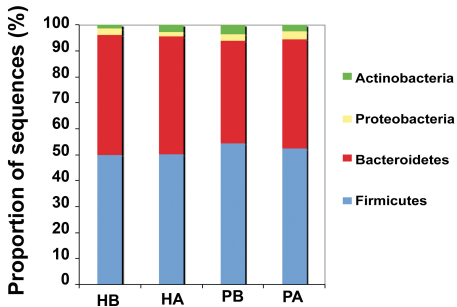

Supplement: gutjnl-2012-303013-s2.pdf [file gutjnl-2012-303013-s2.pdf]

**A**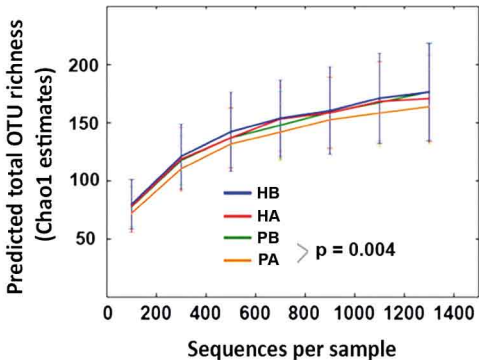**B**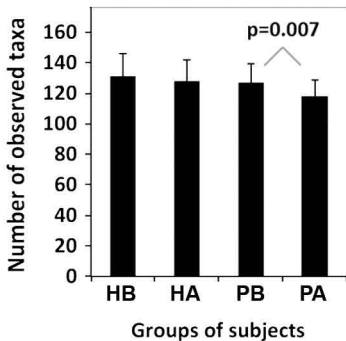

Supplement: gutjnl-2012-303013-s3.pdf [file gutjnl-2012-303013-s3.pdf]
