# Supplementary figures and images for: Anal gas evacuation and colonic microbiota in patients with flatulence: effect of diet
Source: HighWire-hosted journal article supplement (doi:10.1136/gutjnl-2012-303013), 2013-06-13

# Supplemental Figure S1

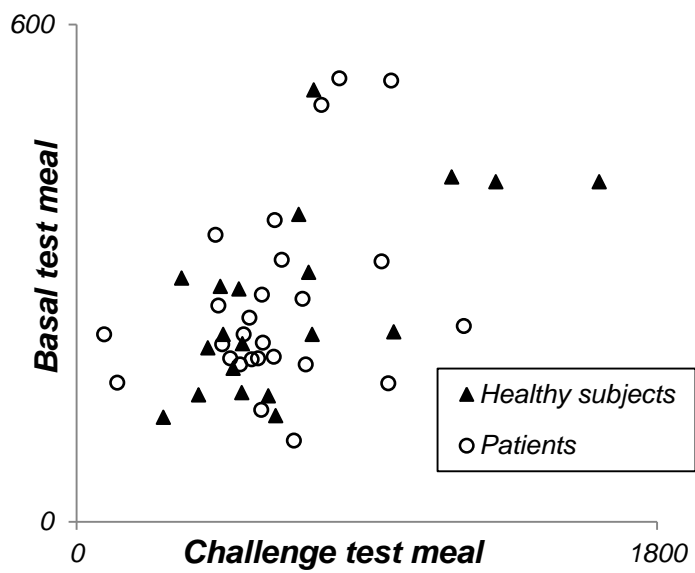

Supplement: gutjnl-2012-303013supp_figure1.pdf [file gutjnl-2012-303013supp_figure1.pdf]
